# Supplementary material for: Systematic Review with Meta-Analysis: Diagnostic Accuracy of Pro-C3 for Hepatic Fibrosis in Patients with Non-Alcoholic Fatty Liver Disease
Source: Biomedicines. 2021 Dec 15;9(12):1920. doi: 10.3390/biomedicines9121920 (PMC8698886; doi:10.3390/biomedicines9121920)
Supplement: Supplementary file 1 [file biomedicines-09-01920-s001.zip]

Archive with 9 entries (9 files):
- Suppl Figure S1 PRISMA DTA Checklist.tif
- Supplementary Figure S1.pdf
- Supplementary Figure S2-1.svg
- Supplementary Figure S2-2.svg
- Supplementary Figure S3A.svg
- Supplementary Figure S3B.svg
- Supplementary Table S1.pdf
- Supplementary Table S2.pdf
- Supplementary Table S3.pdf
