# Supplementary material for: Systematic Review with Meta-Analysis: Diagnostic Accuracy of Pro-C3 for Hepatic Fibrosis in Patients with Non-Alcoholic Fatty Liver Disease
Source: Biomedicines. 2021 Dec 15;9(12):1920. doi: 10.3390/biomedicines9121920 (PMC8698886; doi:10.3390/biomedicines9121920)
Supplement: Supplementary file 1 [file biomedicines-09-01920-s001.zip › Supplementary Table S1.pdf]

Supplementary Table S1: MEDLINE search strategy; run on January 2<sup>nd</sup>, 2020 and on November 1st, 2020.

|    |                                                                                                                                                                                                                                                                                                                                                                           |         |
|----|---------------------------------------------------------------------------------------------------------------------------------------------------------------------------------------------------------------------------------------------------------------------------------------------------------------------------------------------------------------------------|---------|
| 1  | exp Fatty Liver/                                                                                                                                                                                                                                                                                                                                                          | 31239   |
| 2  | (NAFL* or NASH*).mp.                                                                                                                                                                                                                                                                                                                                                      | 19808   |
| 3  | "non-alcoholic fatty liver disease*".mp.                                                                                                                                                                                                                                                                                                                                  | 15260   |
| 4  | ((fatty or fat or steato*) adj3 (liver* or hepat*)) or steatohepat* or (visceral adj2 steato*).ti,ab.                                                                                                                                                                                                                                                                     | 48508   |
| 5  | 1 or 2 or 3 or 4                                                                                                                                                                                                                                                                                                                                                          | 60354   |
| 6  | exp "sensitivity and specificity"/ or exp "mass screening"/ or "reference values"/ or "false positive reactions"/ or "false negative reactions"/ or specificit\$.tw. or screening.tw. or false positive\$.tw. or false negative\$.tw. or accuracy.tw. or predictive value\$.tw. or reference value\$.tw. or roc\$.tw. or likelihood ratio\$.tw. or predictive value\$.tw. | 1925738 |
| 7  | (type III pro-collagen or type III procollagen or type 3 pro-collagen or type 3 procollagen or Pro-C3 or Proc3 or P3NP or procollagen type III N-terminal peptide or PIIINP or N-terminal propeptide of type III collagen).ti,ab,kf.                                                                                                                                      | 1282    |
| 8  | 5 and 6 and 7                                                                                                                                                                                                                                                                                                                                                             | 8       |
| 9  | exp animals/ not humans/                                                                                                                                                                                                                                                                                                                                                  | 4648880 |
| 10 | 8 not 9                                                                                                                                                                                                                                                                                                                                                                   | 8       |
