# Supplementary material for: Systematic Review with Meta-Analysis: Diagnostic Accuracy of Pro-C3 for Hepatic Fibrosis in Patients with Non-Alcoholic Fatty Liver Disease
Source: Biomedicines. 2021 Dec 15;9(12):1920. doi: 10.3390/biomedicines9121920 (PMC8698886; doi:10.3390/biomedicines9121920)
Supplement: Supplementary file 1 [file biomedicines-09-01920-s001.zip › Supplementary Table S2.pdf]

**Supplementary Table S2.** Additional data received from authors of primary publications

| <b>Study ID</b>                   | <b>Additional data requested?</b> | <b>What extra data received</b>                                                                                                                            |
|-----------------------------------|-----------------------------------|------------------------------------------------------------------------------------------------------------------------------------------------------------|
| <b>Daniels 2019</b> [29]          | Yes                               | 2x2 data and cut-off for Pro-C3 alone (not ADAPT panel)                                                                                                    |
| <b>Boyle 2019</b> [28]            | Not necessary                     | -                                                                                                                                                          |
| <b>Huber 2019</b> [44]            | Yes                               | 2x2 data at two suggested cut-offs (15.6 and 21.3 ng/mL)                                                                                                   |
| <b>Luo 2018</b> [23]              | Not necessary                     | -                                                                                                                                                          |
| <b>Nielsen, Leeming 2021</b> [30] | Not necessary                     | -                                                                                                                                                          |
| <b>Bril 2019</b> [41]             | Yes                               | 2x2 data for patients with NAFLD only, excluding the “No NAFLD” group                                                                                      |
| <b>Knöchel 2021</b> [42]          | Yes                               | Confirmation of exclusion criteria and no overlapping patient groups with other included studies; 2x2 data at two suggested cut-offs (15.6 and 21.3 ng/mL) |
| <b>Erhardtson 2021</b> [45]       | Not necessary                     | -                                                                                                                                                          |
