# Supplementary material for: Systematic Review with Meta-Analysis: Diagnostic Accuracy of Pro-C3 for Hepatic Fibrosis in Patients with Non-Alcoholic Fatty Liver Disease
Source: Biomedicines. 2021 Dec 15;9(12):1920. doi: 10.3390/biomedicines9121920 (PMC8698886; doi:10.3390/biomedicines9121920)
Supplement: Supplementary file 1 [file biomedicines-09-01920-s001.zip › Supplementary Table S3.pdf]

Supplementary Table S3: Incorporation of Pro-C3 into diagnostic panels for advanced fibrosis in patients with NAFLD.

| Name  | Panel components                                 | Formula                                                                                                                                                                | Reported AUC (95% CI)                        |
|-------|--------------------------------------------------|------------------------------------------------------------------------------------------------------------------------------------------------------------------------|----------------------------------------------|
| ADAPT | Age, platelets, diabetes, Pro-C3                 | ADAPT = $\exp(\log_{10}((\text{Age} \times \text{Pro-C3})/\sqrt{\text{Platelets}})) + \text{Diabetes}$                                                                 | 0.87 (0.83-0.91)(22)<br>0.85 (0.82-0.89)(21) |
| FIBC3 | Age, BMI, T2DM, platelets, Pro-C3                | FIBC3 = $-5.939 + (0.053 \times \text{Age}) + (0.076 \times \text{BMI}) + (1.614 \times \text{T2DM}) - (0.009 \times \text{platelets}) + (0.071 \times \text{PRO-C3})$ | 0.85 (0.81-0.89)(21)                         |
| ABC3D | Age, BMI, platelet count < 200, Pro-C3, diabetes | Age $\geq 50$ = 1 point, BMI $\geq 30$ = 1 point, platelet Count $\leq 200$ = 1 point, PRO-C3 $\geq 15.5$ = 1 point, Diabetes = 2 points                               | 0.83 (0.79-0.87)(21)                         |
